# Supplementary material for: HIF-inducible miR-191 promotes migration in breast cancer through complex regulation of TGFβ-signaling in hypoxic microenvironment
Source: PubMed Central journal article supplement (PMC4394754; doi:10.1038/srep09650), 2015-04-13

## **HIF-inducible miR-191 promotes migration in breast cancer through complex regulation of TGF $\beta$ -signaling in hypoxic microenvironment.**

Neha Nagpal<sup>1</sup>, Hafiz M Ahmad<sup>2</sup>, Shibu Chameettachal<sup>3</sup>, Durai Sundar<sup>1</sup>, Sourabh Ghosh<sup>3</sup>, Ritu Kulshreshtha<sup>1\*</sup>

### **Supplementary data 1.- List of primers used**

#### **Supplementary data 2.- Functional assay for confirmation of hypoxic microenvironment or HIF activity**

**a.** All the experiments have been performed by exposing the cells to 0.2% hypoxia (0.2% pO<sub>2</sub>) in the hypoxic chamber for 24 hrs. The hypoxic microenvironment was confirmed by exposing the cells transfected with EPO-HRE to hypoxic microenvironment. Significantly high luciferase activity was observed in the cells exposed to hypoxic microenvironment. **b.** Activity of the HIF-1/2- $\alpha$  overexpression constructs or HIF-1/2- $\alpha$  specific shRNAs was confirmed through dual luciferase assay by cotransfecting EPO-HRE reporter plasmid in MCF7 cells. Graph represents relative luciferase activity. **c.** MCF7 cells were transfected with HIF-1 $\alpha$  overexpressing plasmid/vector control (PC) and shHIF-1 $\alpha$ /shCtrl to overexpress/ inhibit the expression of HIF-1 $\alpha$  and western blotting was done to measure the HIF-1 $\alpha$  levels. The graphical data points in a & b represent mean  $\pm$  S.D of at least three independent experiments. (\*P<0.05, \*\*P<0.01). Error bars denote  $\pm$  SD.

#### **Supplementary data 3.- Confirmation of overexpression/ inhibition of specific molecules achieved by transient transfection**

**a,b.** Level of miR-191 was transiently up/ downregulated by transfecting with pre-191 (Ambion) & anti-191 oligos (Exiqon) and exposed to hypoxic microenvironment for 24 hrs. The corresponding effect on the expression of miR-191 was then checked by qRT-PCR compared to that of their respective controls in MCF-7 cells. **c-e.** MCF-7 cells were transfected with pcdnA3.1-HuR or with esiRNA for HuR inhibition and exposed to hypoxic microenvironment for 24 hrs. The graph shows relative expression levels as determined by qRT-PCR (**c,d**) and western blotting (**e**) of HuR compared to that of respective control transfected cells. **f-h.** MCF-7 cells were transfected with TGF $\beta$ 2 esiRNA or treated with recombinant TGF $\beta$ 2 and the efficiency of esiRNA mediated inhibition or overexpression was confirmed through measuring TGF $\beta$ 2 levels through qRT-PCR (**f,g**) or luciferase activity of pTPlux reporter construct (**h**). **i.** qRT-PCR data showing effect of ctrl or SMAD3 siRNA on SMAD3 levels in MCF7 cells. The graphical data points represent mean  $\pm$  S.D of at least three independent experiments. (\*\*P<0.01). Error bars denote  $\pm$  SD.

#### **Supplementary data 4.- Effect of miR-191 on TGF $\beta$ 2 & HuR levels in the presence/absence of hypoxic microenvironment**

**a,b.** Effect of miR-191 on TGF $\beta$ 2 and HuR at protein levels in hypoxic microenvironment. The MCF7 cells with differential level of miR-191 were exposed to hypoxic microenvironment and analyzed for expression of TGF $\beta$ 2 (**a**) and HuR (**b**) protein by western blotting and the relative protein levels were then quantified using imagej software for band densitometry. **c.** Level of miR-191 was differentially modulated and cells (MCF7) were exposed to hypoxic microenvironment, Immunofluorescence was done by using an antibody specific for TGF $\beta$ 2 to compare the difference in fluorescence intensity observed. **d.** Cells were transfected with esictrl or esiHuR oligos in normoxia and qRT-PCR was performed. The results show that under normoxic conditions HuR is unable to downregulate TGF $\beta$ 2 levels in breast cancer cell lines. **e-g** qRT-PCR was done to find out the effect of miR-191 on TGF $\beta$ 2 & HuR levels in both normoxic and hypoxic microenvironment in a panel of breast cancer cell lines MCF7 (**e**), T47D (**f**) & MM231 (**g**). We found that the effect was minimal in the absence of hypoxic microenvironment. The graphical data points in a-g represent mean  $\pm$  S.D of at least three independent experiments. (\*P<0.05, \*\*P<0.01, \* $\Delta$ P>0.05<0.1). Error bars denote  $\pm$  SD.

**Supplementary data 5.- HuR is a direct target of miR-191.**

**a.** Diagram showing sequence and position of miR-191 binding sites (wild type: HuR B1 & B2, mutant type HuR Mut B1) in HuR 3'UTR. **b,c.** 3'UTR luciferase activity of luciferase constructs (individually cloned: HuR B1, HuR B2, Both together: HuR B1&2) in response to differential miR-191 levels. It was found that miR-191 overexpression led to decrease in luciferase activity with HuR B1 and HuR B1&2 constructs (**b**) while lesser effect was observed with HuR B2 (**b**) or mutated HuR B1 sites (**c**). Therefore, miR-191 mediated downregulation of HuR is mediated mainly through binding to the HuR B1 site present in the HuR 3'UTR. The graphical data points in **b** & **c** represent mean  $\pm$  S.D of at least three independent experiments. (\*P<0.05, \*\*P<0.01, \*^P>0.05<0.1). Error bars denote  $\pm$  SD.

**Supplementary data 6.- Diagram showing putative miR-191 and HuR binding sites in TGF $\beta$ 2 3'UTR**

Diagram showing in-silico analysis data of the 3'UTR region of TGF $\beta$ 2 for the putative HuR consensus sequences and miR-191 binding sites using RNAhybrid, ARE score and catRAPID softwares. The 3'UTR region containing the miR-191 and HuR binding sites of TGF $\beta$ 2-3'UTR was cloned and checked for luciferase activity. Primer details are given in **Supplementary data 1**.

**Supplementary data 7.- Validation of hypoxic microenvironment and transfection efficiency in the tumor spheroids**

**a.** To recapitulate the endogenous hypoxic microenvironment 3D tumor spheroids were manifested and the level of *VEGFA* was sought as a marker of hypoxic microenvironment. **b.** The 3D tumor spheroids of MCF7 were transfected with anti-miR91/NCtrl and the effectiveness of transfection was confirmed by qRT-PCR. The graph shows miR-191 levels in anti-miR-191/NCtrl treated MCF7 spheroids on day 1 and 7. The readings were normalized using U6. . The graphical data points in **a** and **b** represent mean  $\pm$  S.D of at least three independent experiments. (\*P<0.05, \*\*P<0.01). Error bars denote  $\pm$  SD.

**Supplementary Data 1- List of Primers**

| <b>Primer Detail</b>                                                                    | <b>Primer Sequence</b>                                       | <b>Annealing Temperature</b>     |                              |
|-----------------------------------------------------------------------------------------|--------------------------------------------------------------|----------------------------------|------------------------------|
| <b>miR-191 RT primer</b>                                                                | GTCGTATCCAGTGCAGGGTCCGAGGTATTCGCACTGGATACGACCA<br>GCTG       | 42°C                             |                              |
| <b>RNU6B RT primer</b>                                                                  | GTCGTATCCAGTGCAGGGTCCGAGGTATTCGCACTGGATACGACAA<br>AATATGGAAC | 42°C                             |                              |
| <b>miR-191 forward primer</b>                                                           | CGCGCAACGGAATCCCA                                            | 60°C                             |                              |
| <b>RNU6B forward primer</b>                                                             | GCCCCTGCGCAAGGATGAC                                          | 60°C                             |                              |
| <b>Stem-loop reverse universal</b>                                                      | GTGCAGGGTCCGAGGT                                             | 60°C                             |                              |
| <b>Primers designed to detect transcript levels of various shortlisted target genes</b> |                                                              |                                  |                              |
| <b>Primer Detail</b>                                                                    | <b>Forward Primer</b>                                        | <b>Reverse Primer</b>            | <b>Annealing Temperature</b> |
| <b>PTGS2</b>                                                                            | TCAGTAGGTGCATTGGAATCAAGC                                     | TAGCAGTCCTGAGCTGAGGTTTACC        | 60°C                         |
| <b>BMP4</b>                                                                             | AGCATGTCAGGATTAGCCGATCG                                      | AGTCATTCCAGCCCACATCGC            | 60°C                         |
| <b>SMAD3</b>                                                                            | GAGATGATGGGCTAAACAGGCAAC                                     | CACTGTCCTTGGGAGGAGAGACC          | 60°C                         |
| <b>TGFβ2</b>                                                                            | AGTCATAACACCTTTCCGATTGCC                                     | AAAGCATGGTGCAAACATCTCTCTG        | 60°C                         |
| <b>TGFβ1</b>                                                                            | TCCTGGCGATACCTCAGCAAC                                        | TGAACCCGTTGATGTCCACTTG           | 60°C                         |
| <b>JUN</b>                                                                              | GTGTGCACGAGTGGGAAGG                                          | GATCGAATGTTAGGTCCATGGAG          | 58°C                         |
| <b>FOS</b>                                                                              | AATGACCCTGAGCCCAAGCC                                         | AGCTCTGTGGCCATGGCC               | 58°C                         |
| <b>CTGF</b>                                                                             | AGCGTGCTCACTGACCTGCC                                         | TCACTTGCCACAAGCTGTCCAG           | 60°C                         |
| <b>VEGFA</b>                                                                            | GCTACTGCCATCCAATCGAGAC                                       | CTATGTGCTGGCCTTGGTGAG            | 58°C                         |
| <b>HuR</b>                                                                              | ACCAATGTGAAAGTGATCC                                          | TATGAATTCTTATTTGTGGGACTTGT<br>TG | 55°C                         |

| <b>Primers designed to amplify HIF binding sites in miR-191 promoter for CHIP assay</b> |                                                                    |                                                                    |                   |
|-----------------------------------------------------------------------------------------|--------------------------------------------------------------------|--------------------------------------------------------------------|-------------------|
| <b>Ctrl</b>                                                                             | AGGCGCGCTTCGATGACG                                                 | AGGCAGGCGAGGGCATGG                                                 | 60 <sup>o</sup> C |
| <b>H1</b>                                                                               | GCTCCCTGTGCCATGTTGTCC                                              | TCACCATGTTGGCCAGGCTG                                               | 60 <sup>o</sup> C |
| <b>H2</b>                                                                               | AGCCTGGCCAACATGGTGAAAC                                             | TGCCTCCTTCAGTGTGATGCC                                              | 60 <sup>o</sup> C |
| <b>H3</b>                                                                               | ACTAACTGCACGGTGACTCCTGC                                            | ATCAGGACTGCAGCTTGGCTG                                              | 60 <sup>o</sup> C |
| <b>H4</b>                                                                               | CATCTGACTCTGGCTCCCAAGG                                             | AGGGTTCACCATGTTGGCCAG                                              | 60 <sup>o</sup> C |
| <b>H5</b>                                                                               | ACGACAAATCCACGCAGCCTC                                              | TGATAAACGGAAACCGCGTGC                                              | 60 <sup>o</sup> C |
| <b>H6</b>                                                                               | TGTTCTGTGGCCAGGTGAGC                                               | AGCTGCTTTTGGGATTCCGTTG                                             | 60 <sup>o</sup> C |
| <b>Primers designed to clone the 3'UTR luciferase reporter constructs</b>               |                                                                    |                                                                    |                   |
| <b>TGFβ2</b>                                                                            | ATTGAGCTCTGCTTTGGCTTT<br>CTGGTTCTATG                               | ATTAAGCTTGAGGAGTCTGGTCTT<br>GTAGGTAGC                              | 57 <sup>o</sup> C |
| <b>Mut-TGFβ2</b>                                                                        | CAGATATAACAAGAGCCACG<br>TGCTTTCTCCCCTTGGTTGTT<br>TGGGATCAGCTACTTGC | GCAAGTAGCTGATCCCAAACAAC<br>CAAGGGGAGAAAGCACGTGGCTC<br>TTGTTATATCTG | 57 <sup>o</sup> C |
| <b>HuR B1</b>                                                                           | ATAACTAGTGGCAATTGGCG<br>TGTAATGATG                                 | ATTAAGCTTCACATGGTCATGGTC<br>AAAGAGG                                | 57 <sup>o</sup> C |
| <b>HuR B2</b>                                                                           | ATAACTAGTCACCTCTTTGAC<br>CATGACCATGTG                              | ATTAAGCTTTGGGAATCGGTAAAG<br>AGAGCCTC                               | 57 <sup>o</sup> C |
| <b>HuR B1 &amp;2</b>                                                                    | ATAACTAGTGGCAATTGGCG<br>TGTAATGATG                                 | ATTAAGCTTTGGGAATCGGTAAAG<br>AGAGCCTC                               | 60 <sup>o</sup> C |
| <b>Mut-HuR B1</b>                                                                       | TCCACCAGAAGAGAAGCCTT<br>TTGGCTTGTTTTGGGGCCACC<br>TCTTTGAC          | GTCAAAGAGGTGGCCCCAAACCA<br>AGCCAAAAGGCTTCTCTTCTGGTG<br>GA          | 66 <sup>o</sup> C |
| <b>H2-HRE</b>                                                                           | ATAACGCGTAGCCTGGCCAA<br>CATGGTGAAAC                                | ATACTCGAGAGAGTGCTTGGTTCC<br>AAGGTATGTG                             | 60 <sup>o</sup> C |
| <b>H3-HRE</b>                                                                           | ATACTCGAGGCATGAGGTAT<br>GGCAGAGG                                   | ATAACGCGTACCACTGCCCTTATC<br>TTGCCTG                                | 60 <sup>o</sup> C |

## Supplementary Data 2

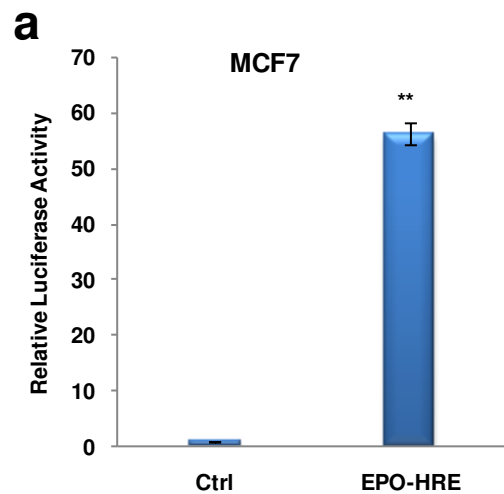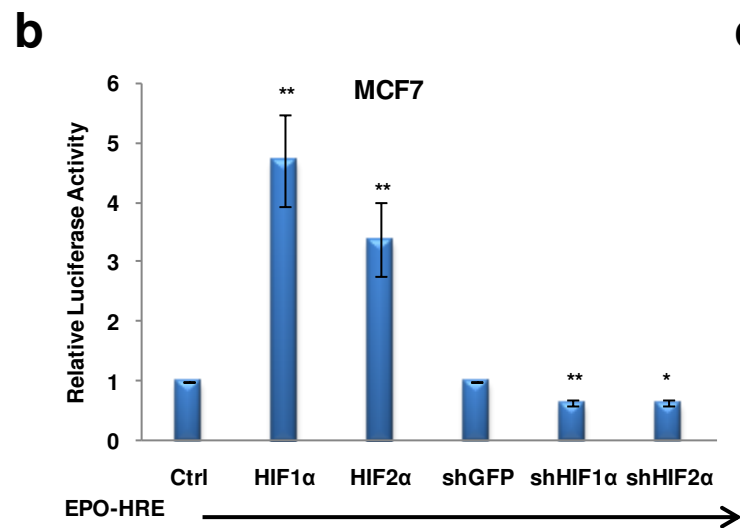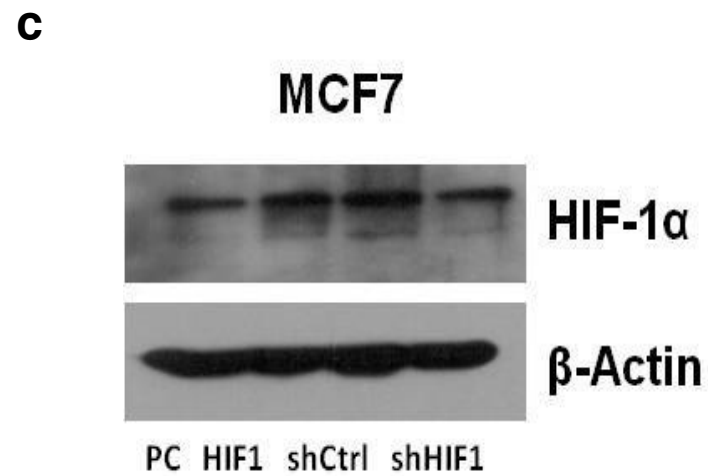

# Supplementary Data 3

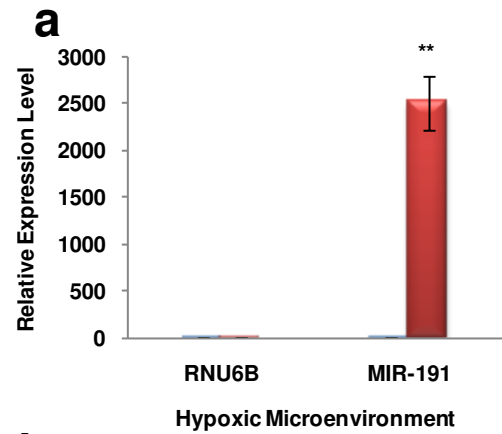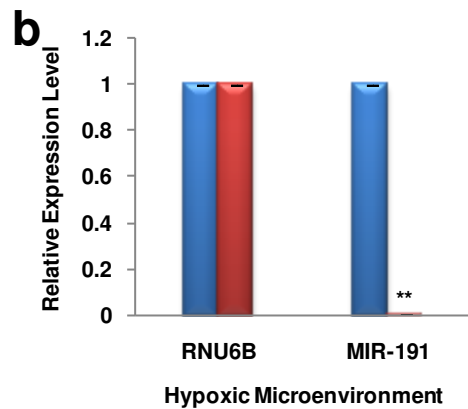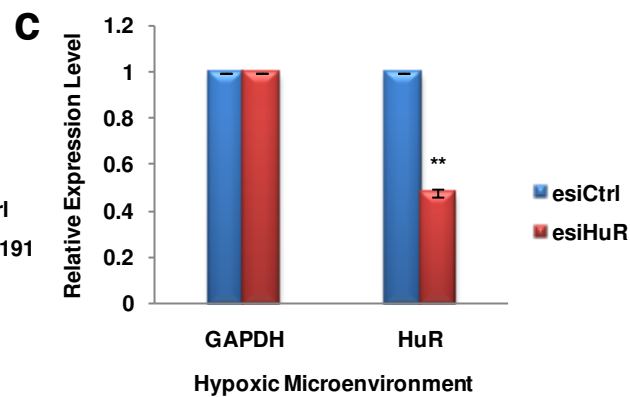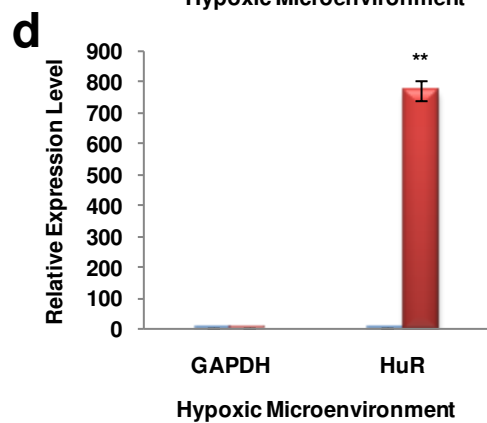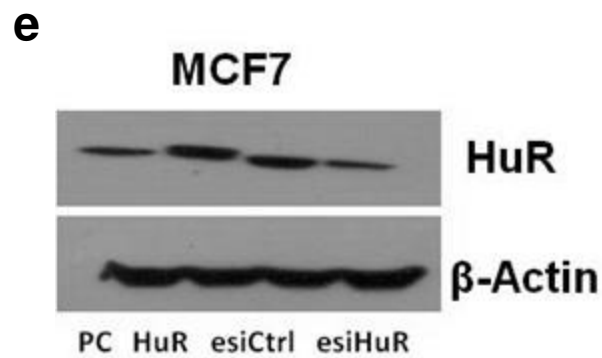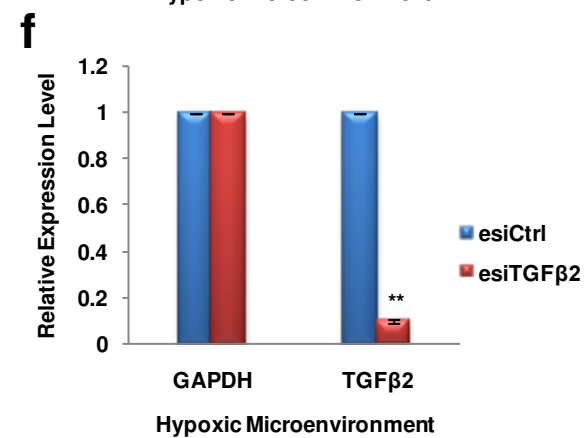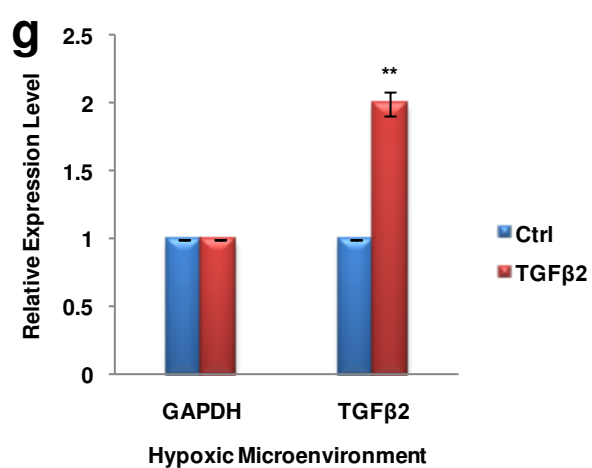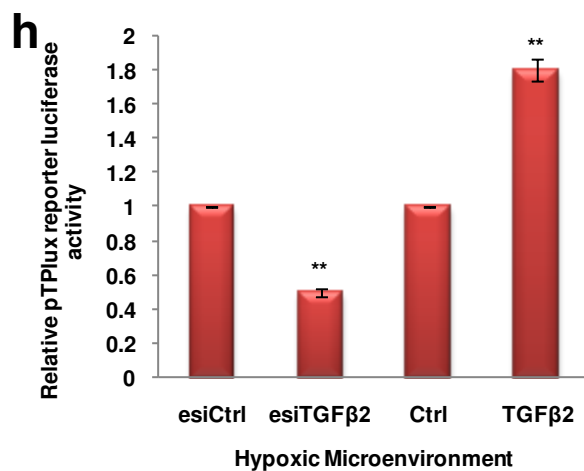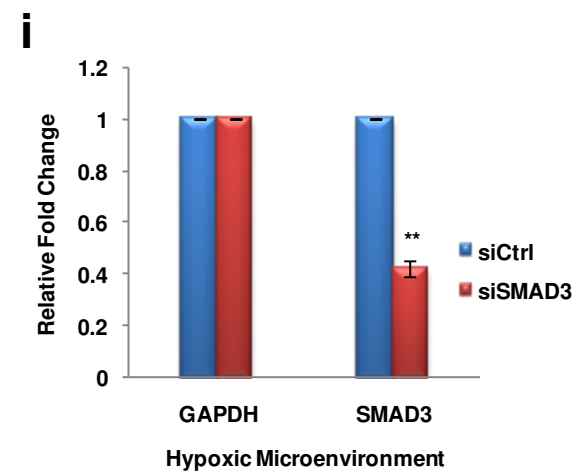

# Supplementary Data 4

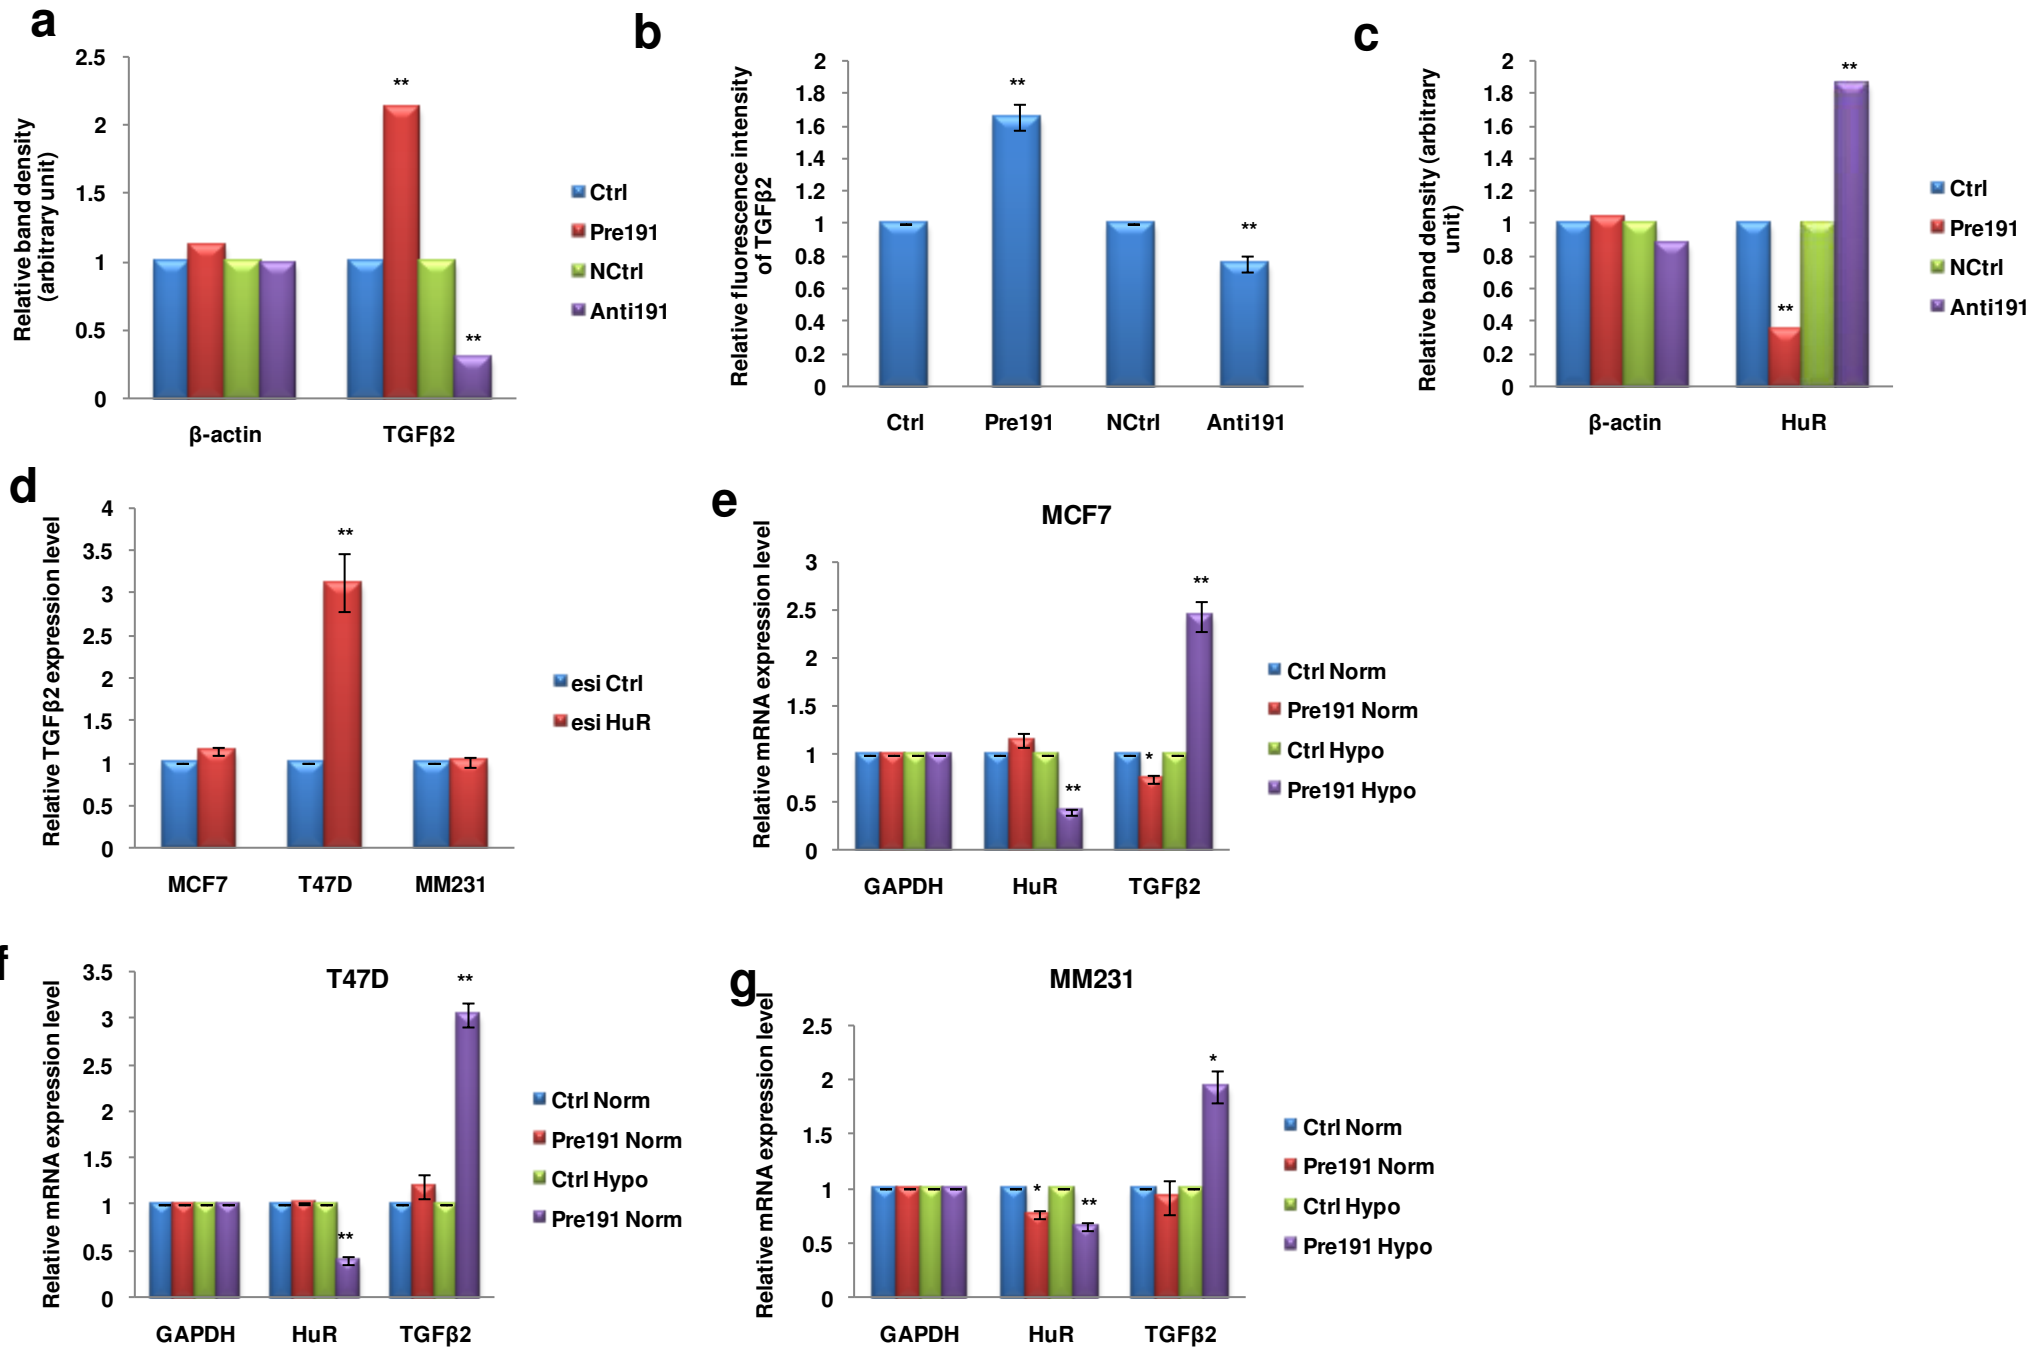

# Supplementary Data 5

**a**

## HuR 3'UTR

5' ...CAGAAGAGAAGCCUUUUCGUUG... (4027-4033)  
 3' GUCGACGAAAACCCUAAGGCAAC miR-191

5' ...CAUGACCAUGUGAUGUUCGUUU... (4071-4077)  
 3' GUCGACGAAAACCCUAAGGCAAC miR-191

5' ...CAGAAGAGAAGCCUUUUGGCUUG... (4027-4033)  
 3' GUCGACGAAAACCCUAAGGCAAC miR-191

**b**

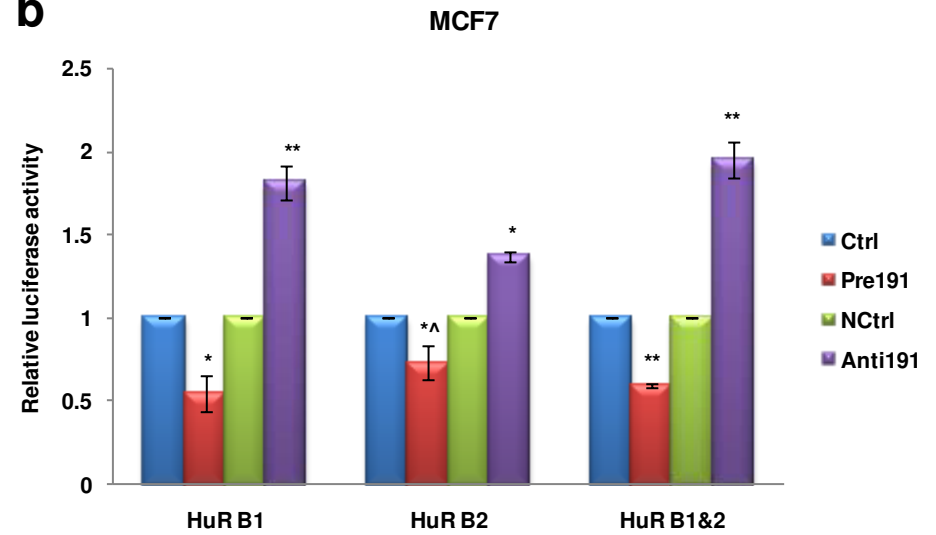

**c**

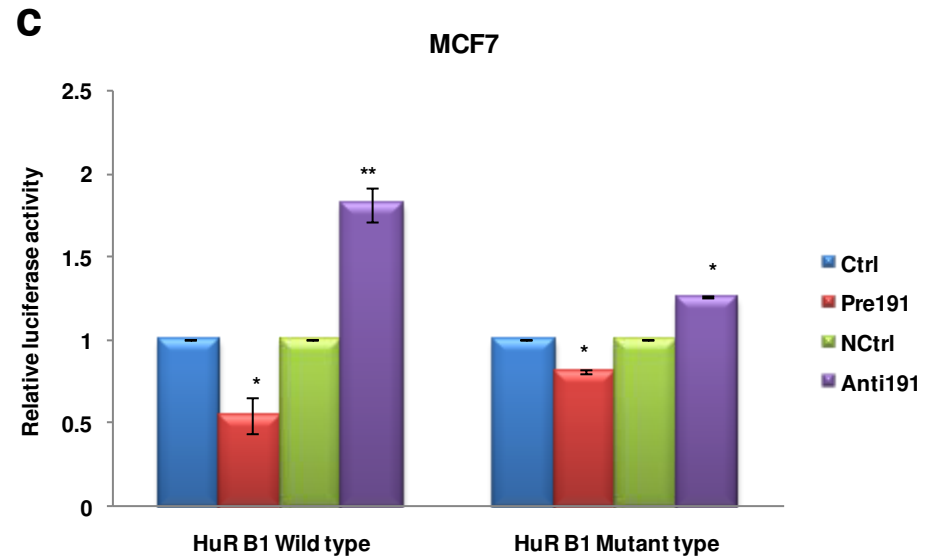



# Supplementary Data 6

## TGFβ2

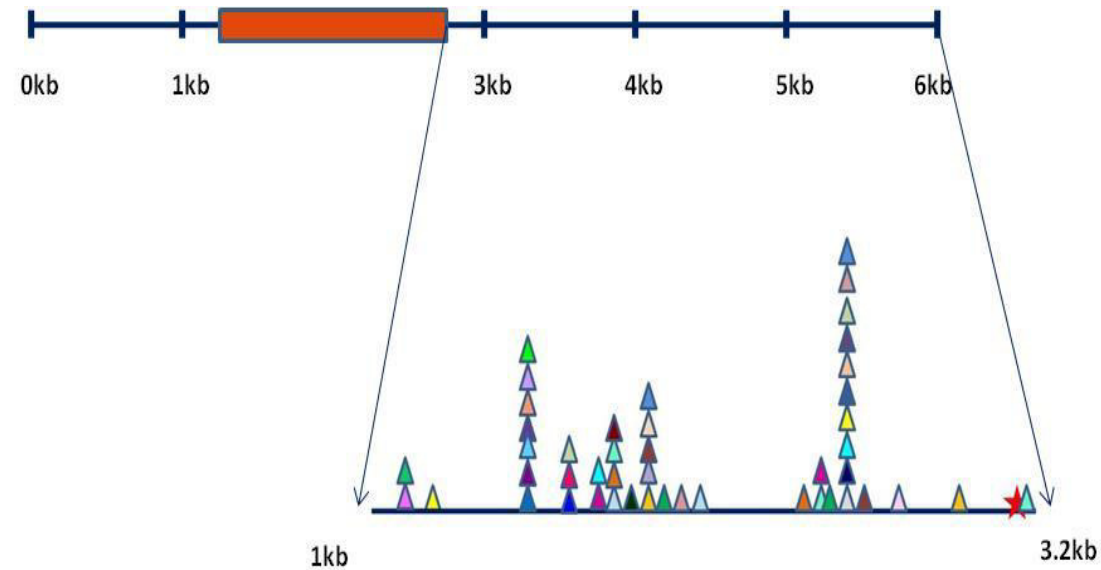

| Symbol | HuR binding consensus        | Position in TGFβ2-3'UTR |
|--------|------------------------------|-------------------------|
|        | AAUUUUUUUU                   | 256-267                 |
|        | ACUUGAUUU                    | 400-408                 |
|        | AGUUUUUUUUUUUUUUUUUUUU       | 785-795                 |
|        | UUUUUUUUUUUUUUUUUU           | 920-933                 |
|        | UGUUUUUUUUUU                 | 1158-1167               |
|        | CAUUUUUUUUUUUU               | 1222-1233               |
|        | UGUUUUUUUU                   | 1261-1269               |
|        | UUUUUUUUUUUUUUUUUUUU         | 1305-1322               |
|        | UUUUUUUUUU                   | 1456-1464               |
|        | CCUUGGUUU                    | 1529-1537               |
|        | UUUUUUUUUU                   | 1598-1606               |
|        | UUUUUUUUUU                   | 2225-2233               |
|        | AUUUUUUUUUU                  | 2265-2274               |
|        | UAUUUUUUUU                   | 2276-2284               |
|        | UGUUUUUUUUUUUUUUUUUUUU       | 2346-2366               |
|        | UCUUUUUUUU                   | 2382-2390               |
|        | AAUUUUUUUU                   | 2469-2477               |
|        | AUUUUUUUUUU                  | 2883-2891               |
|        | AAUUUUUUUU                   | 3163-3171               |
| Symbol | miR-191 Binding Site         | Position in TGFβ2-3'UTR |
| ★      | GAGCCACGUGCUUUUCUGGGGUUGGUUG | 3059-3085               |

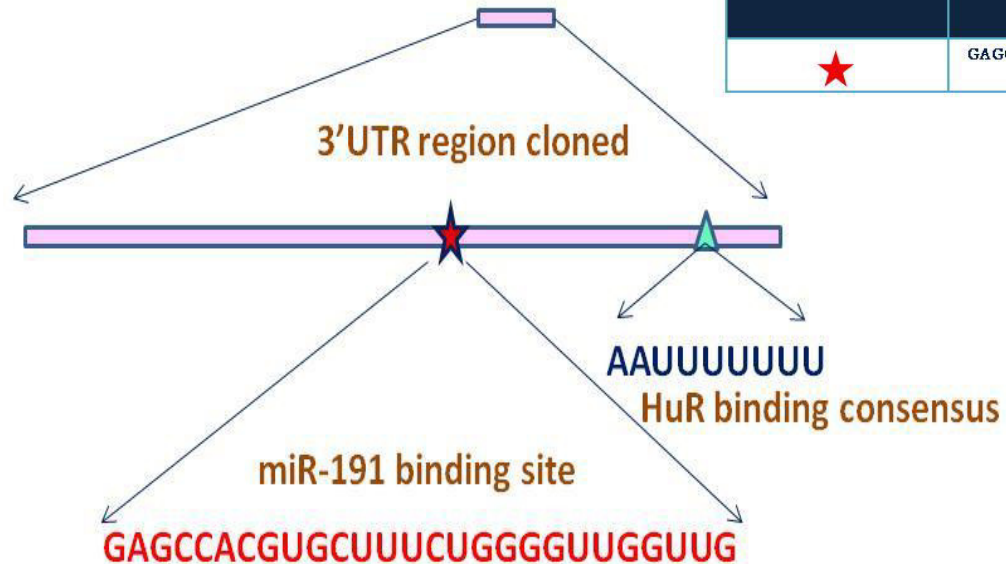

# Supplementary Data 7

**a**

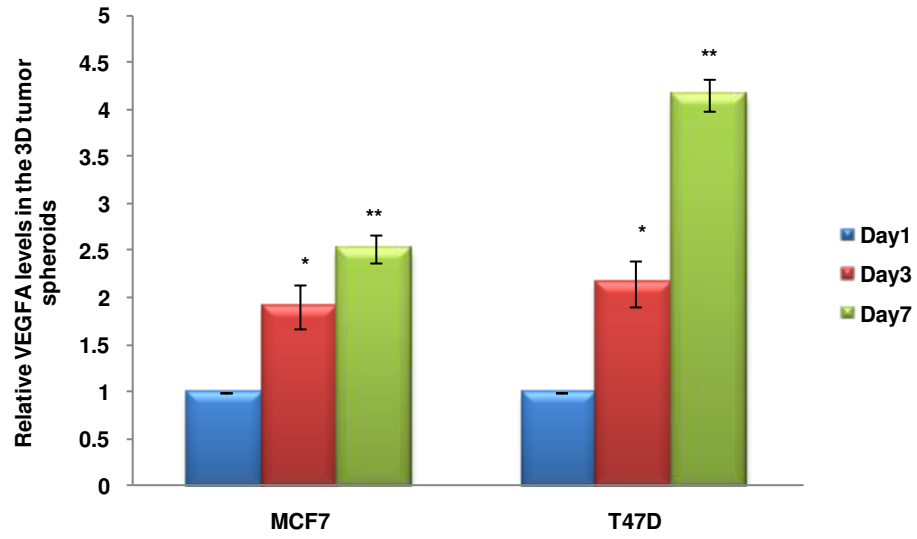

**b**

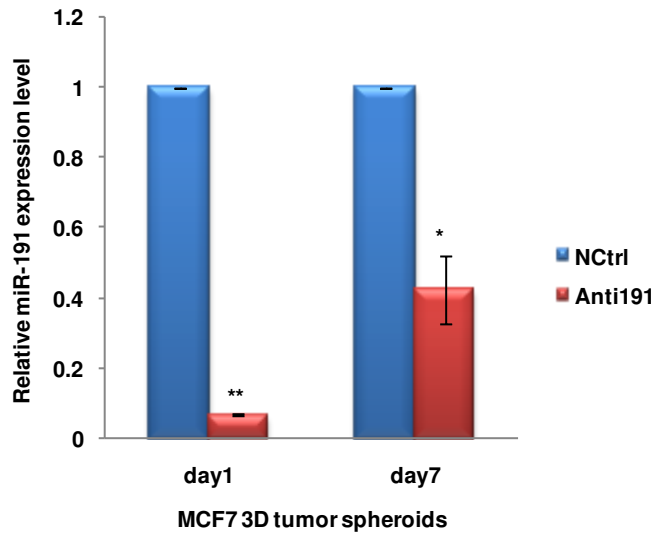

Supplement: srep09650-s1.pdf [file srep09650-s1.pdf]
